# Supplementary material for: Evolutionary Genomics of Plant Gametophytic Selection
Source: PubMed Central journal article supplement — Plant Commun. 2020 Oct 24;1(6):100115. doi: 10.1016/j.xplc.2020.100115 (PMC7748008; doi:10.1016/j.xplc.2020.100115), 2020-10-24
Supplement: mmc1.pdf [file mmc1.pdf]

**Plant Communications, Volume 1**

**Supplemental Information**

**Evolutionary Genomics of Plant Gametophytic Selection**

**Felix E.G. Beaudry, Joanna L. Rifkin, Spencer C.H. Barrett, and Stephen I. Wright**

**Table S1. Gene expression counts (percentage) for gametophytes and sporophytes from previous work**

| <b>Species</b>              | <b>Reference</b>                    | <b>Pollen</b> | <b>Ovule</b> | <b>Seed.</b> | <b>P+O</b> | <b>P+S</b> | <b>O+S</b>  | <b>All</b>  |
|-----------------------------|-------------------------------------|---------------|--------------|--------------|------------|------------|-------------|-------------|
| <i>Zea mays</i>             | Chettoor et al 2014                 | 812 (.02)     | 3632 (.1)    | 2800 (.09)   | 755 (.02)  | 662 (.02)  | 11740 (.36) | 12362 (.38) |
| <i>Arabidopsis thaliana</i> | Wuest et 2010;<br>Borges et al 2008 | 1217 (.08)    | 566 (.04)    | 4705 (.3)    | 354 (.02)  | 2671 (.17) | 2027 (.13)  | 4119 (.26)  |
